# Supplementary material for: Feasibility of a pharmacist-led physical health monitoring for patients on antipsychotic medications: protocol for a longitudinal study
Source: HighWire-hosted journal article supplement (doi:10.1136/bmjopen-2021-059573), 2022-06-01
Supplement: bmjopen-2021-059573supp001_data_supplement.pdf [file bmjopen-2021-059573supp001_data_supplement.pdf]

**Appendix 1:****1a: Data collection sheet for baseline reviews****DATA COLLECTION SHEET \*\*BASELINE\*\***

---

---

**PARICIPANT DETAILS**

1. ID code:
  2. Gender:
  3. Allergies:
- 

**APPOINTMENT DETAILS**

Pharmacy site:

Appointment date:

---

**GENERAL ASSESSMENT**Medical conditions:

---

---

---

---

---

---

Medication History:

---

---

---

---

---

---

Relevant lifestyle factors:

- 
- Diet

---

---

---

Physical activity

---

---

---

Smoking:

---

---

---

Other (e.g. alcohol intake):

---

---

---

Family history of the following:

- Hypertension
- Type II Diabetes
- Obesity
- Dyslipidaemia
- History of cardiovascular events (stroke, myocardial infarction)
- Other:

---

#### PHYSICAL HEALTH PARAMETERS

Weight (kg):

Height (cm):

BMI:

Waist circumference (cm):

Blood Glucose levels (tick relevant):

Random:

Fasting:

Serum Lipid levels (tick relevant):

Random:

Fasting:

TG:

HDL:

Blood Pressure:

|           | First reading | Second reading | Third reading |
|-----------|---------------|----------------|---------------|
| Systolic  |               |                |               |
| Diastolic |               |                |               |

---

## OSA ASSESSMENT

STOP – Bang Questionnaire result:

Action taken (if any):

---

---

---

## PATIENT EDUCATION

Discussion of relevant lifestyle factors

---

---

---

---

---

---

---

---

---

---

Goals and relevant strategies discussed:

---

---

---

---

---

---

---

---

---

---

Referral to GP

- Yes
- No

Reason for referral (if referred):

---

---

---

---

---

Pharmacist signature & date: .....

**Extra documentation space (please label and document clearly):**

**1b: Data collection sheet for follow-up reviews****DATA COLLECTION SHEET \*\*FOLLOW-UP\*\***

---

---

**PARTICIPANT DETAILS**

4. ID code:
  5. Gender:
  6. Allergies:
- 

**APPOINTMENT DETAILS**

Pharmacy site:  
Appointment date:

---

**GENERAL ASSESSMENT**

Medical conditions:

---

---

---

---

---

---

Medication History:

---

---

---

---

---

---

Relevant lifestyle factors:

- Diet

---

---

---

Physical activity

---

---

---

Smoking:

---

---

---

Other (e.g. alcohol intake):

---

---

---

Family history of the following:

- Hypertension
- Type II Diabetes
- Obesity
- Dyslipidaemia
- History of cardiovascular events (stroke, myocardial infarction)
- Other:

---

#### PHYSICAL HEALTH PARAMETERS

Weight (kg):

Height (cm):

BMI:

Waist circumference (cm):

Blood Glucose levels (tick relevant):

- Random:  
 Fasting:

Serum Lipid levels (tick relevant):

- Random:  
 Fasting:

TG:

HDL:

Blood Pressure:

|           | First reading | Second reading | Third reading |
|-----------|---------------|----------------|---------------|
| Systolic  |               |                |               |
| Diastolic |               |                |               |

---

#### PATIENT EDUCATION

Was the participant previously referred to a GP? **Yes/ No**

If yes - did the participant act on the referral? (**Why/Why not**)

- **please document** nature of discussion and action taken by GP (e.g referrals, medications etc)

---



---



---



---



---

Discussion of relevant lifestyle factors:

---



---



---

---

---

---

---

---

---

Goals and relevant strategies discussed:

---

---

---

---

---

---

---

---

---

---

Referral to GP

- Yes
- No

Reason for referral (if referred):

---

---

---

---

---

Pharmacist signature & date: .....

**Extra documentation space (please label and document clearly):**
